# Supplementary material for: Phylogenetic Identification, Diversity, and Richness of Aspergillus from Homes in Havana, Cuba
Source: MDPI journal article supplement (doi:10.3390/microorganisms9010115), 2021-01-06
Supplement: s1 [file s1]

Supplementary Table S1. Groups identified in the phylogenetic tree obtained by maximum likelihood from *BenA* gene sequences

| Group     | Isolate                             | Genbank<br>Access<br>Number | Specie                 | Section      |
|-----------|-------------------------------------|-----------------------------|------------------------|--------------|
| <b>I</b>  | *MH614486.1 <i>A. welwitschiae</i>  |                             | <i>A. welwitschiae</i> | <i>Nigri</i> |
|           | *MH614483.1- <i>A. welwitschiae</i> |                             |                        |              |
|           | *MH614497.1 <i>A. welwitschiae</i>  |                             |                        |              |
|           | CCMFBH-845                          | MT410098                    |                        |              |
|           | CCMFBH-848                          | MT410099                    |                        |              |
|           | CCMFBH-849                          | MT410100                    |                        |              |
|           | CCMFBH-852                          | MT410101                    |                        |              |
|           | CCMFBH-855                          | MT410102                    |                        |              |
|           | CCMFBH-883                          | MT410103                    |                        |              |
|           | CCMFBH-901                          | MT410104                    |                        |              |
|           | CCMFBH-903                          | MT410106                    |                        |              |
|           | CCMFBH-926                          | MT410105                    |                        |              |
|           | CCMFBH-928                          | MT410107                    |                        |              |
|           | CCMFBH-932                          | MT410070                    |                        |              |
|           | CCMFBH-934                          | MT410108                    |                        |              |
|           | CCMFBH-936                          | MT410109                    |                        |              |
|           | CCMFBH-939                          | MT410072                    |                        |              |
|           | CCMFBH-942                          | MT410110                    |                        |              |
|           | CCMFBH-944                          | MT410111                    |                        |              |
|           | CCMFBH-949                          | MT410112                    |                        |              |
|           | CCMFBH-975                          | MT410113                    |                        |              |
|           | CCMFBH-981                          | MT410114                    |                        |              |
|           | CCMFBH-983                          | MT410115                    |                        |              |
|           | CCMFBH-988                          | MT410116                    |                        |              |
|           | CCMFBH-994                          | MT410081                    |                        |              |
|           | CCMFBH-997                          | MT410117                    |                        |              |
| <b>II</b> | *MN567299.1 <i>A. niger</i>         |                             | <i>A. niger</i>        | <i>Nigri</i> |
|           | *MH204824.1 <i>A. niger</i>         |                             |                        |              |
|           | *MH208759.1 <i>A. niger</i>         |                             |                        |              |
|           | *MK854747.1 <i>A. niger</i>         |                             |                        |              |
|           | *MG991342.1 <i>A. niger</i>         |                             |                        |              |
|           | CCMFBH-886                          | MT410061                    |                        |              |
|           | CCMFBH-887                          | MT410062                    |                        |              |
|           | CCMFBH-904                          | MT410063                    |                        |              |
|           | CCMFBH-905                          | MT410064                    |                        |              |
|           | CCMFBH-906                          | MT410065                    |                        |              |
|           | CCMFBH-907                          | MT410066                    |                        |              |
|           | CCMFBH-908                          | MT410067                    |                        |              |
|           | CCMFBH-922                          | MT410068                    |                        |              |
|           | CCMFBH-927                          | MT410069                    |                        |              |

|            |                                                                                                                                                                                                                                                                                                                                                                                                             |                                                                                                                                                                                                          |                         |              |
|------------|-------------------------------------------------------------------------------------------------------------------------------------------------------------------------------------------------------------------------------------------------------------------------------------------------------------------------------------------------------------------------------------------------------------|----------------------------------------------------------------------------------------------------------------------------------------------------------------------------------------------------------|-------------------------|--------------|
|            | CCMFBH-937<br>CCMFBH-946<br>CCMFBH-947<br>CCMFBH-951<br>CCMFBH-952<br>CCMFBH-954<br>CCMFBH-966<br>CCMFBH-971<br>CCMFBH-982                                                                                                                                                                                                                                                                                  | MT410071<br>MT410073<br>MT410074<br>MT410075<br>MT410076<br>MT410078<br>MT410079<br>MT410080                                                                                                             |                         |              |
| <b>III</b> | *MH614464.1 <i>A. neoniger</i><br>CCMFBH-839<br>CCMFBH-857                                                                                                                                                                                                                                                                                                                                                  | MT410059<br>MT410060                                                                                                                                                                                     | <i>A. neoniger</i>      | <i>Nigri</i> |
| <b>IV</b>  | *KT326813.1 <i>A. tubingensis</i><br>*JX545086.1 <i>A. tubingensis</i><br>*KX231820.1 <i>A. tubingensis</i><br>CCMFBH-864<br>CCMFBH-880<br>CCMFBH-955<br>CCMFBH-979<br>CCMFBH-996                                                                                                                                                                                                                           | MT410082<br>MT410083<br>MT410084<br>MT410085<br>MT410086                                                                                                                                                 | <i>A. tubingensis</i>   | <i>Nigri</i> |
| <b>V</b>   | *MH614443.1- <i>A. heteromorphus</i><br>*MH614573.1 <i>A. heteromorphus</i><br>*HQ632678.1 - <i>A. heteromorphus</i><br>* AY585529.1- <i>A. heteromorphus</i><br>CCMFBH-836<br>CCMFBH-846<br>CCMFBH-861<br>CCMFBH-867<br>CCMFBH-868<br>CCMFBH-869<br>CCMFBH-871<br>CCMFBH-872<br>CCMFBH-875<br>CCMFBH-881<br>CCMFBH-884<br>CCMFBH-885<br>CCMFBH-900<br>CCMFBH-914<br>CCMFBH-980<br>CCMFBH-998<br>CCMFBH-999 | MT410118<br>MY410125<br>MT410131<br>MT410134<br>MT410135<br>MT410136<br>MT410137<br>MT410138<br>MT410140<br>MT410142<br>MT410143<br>MT410144<br>MT410149<br>MT410155<br>MT410175<br>MT410180<br>MT410181 | <i>A. heteromorphus</i> | <i>Nigri</i> |
| <b>VI</b>  | *EU159220.1- <i>A. aculeatinus</i><br>CCMFBH-909                                                                                                                                                                                                                                                                                                                                                            | MT410151                                                                                                                                                                                                 | <i>A. aculeatinus</i>   | <i>Nigri</i> |

|             |                                                                                                                                    |                                              |                         |                     |
|-------------|------------------------------------------------------------------------------------------------------------------------------------|----------------------------------------------|-------------------------|---------------------|
|             | CCMFBH-913                                                                                                                         | MT410154                                     |                         |                     |
| <b>VII</b>  | *EU076293.1- <i>A. tritici</i><br>CCMFBH-959                                                                                       | MT410168                                     | <i>A. tritici</i>       | <i>Candidi</i>      |
| <b>VIII</b> | LT627280.1 <i>A. chevalieri</i><br>LT627272.1 <i>A. chevalieri</i><br>CCMFBH-912<br>CCMFBH-935                                     | MT410153<br>MT410163                         | <i>A. chevalieri</i>    | <i>Aspergillus</i>  |
| <b>IX</b>   | *KJ775050.1- <i>A. subramanianii</i><br>*EF661339.1- <i>A. subramanianii</i><br>*EF661338.1- <i>A. subramanianii</i><br>CCMFBH-890 | MT410146                                     | <i>A. subramanianii</i> | <i>Circumdati</i>   |
| <b>X</b>    | *FR839686.2- <i>A. westerdijkiae</i><br>*JX535306.1- <i>A. westerdijkiae</i><br>CCMFBH-879<br>CCMFBH-964<br>CCMFBH-995             | MT410141<br>MT410169<br>MT410179             | <i>A. westerdijkiae</i> | <i>Circumdati</i>   |
| <b>XI</b>   | *EU021662.1- <i>A. ochraceus</i><br>*EF661322.1- <i>A. ochraceus</i><br>CCMFBH-917                                                 | MT410156                                     | <i>A. ochraceus</i>     | <i>Circumdati</i>   |
| <b>XII</b>  | *FM995525.1 <i>A. melleus</i><br>*FM995526.1 <i>A. melleus</i><br>CCMFBH-838<br>CCMFBH-919<br>CCMFBH-930<br>CCMFBH-989             | MT410119<br>MT410157<br>MT410161<br>MT410177 | <i>A. melleus</i>       | <i>Circumdati</i>   |
| <b>XIII</b> | *EF652106.1- <i>A. wentii</i><br>CCMFBH-873                                                                                        | MT410139                                     | <i>A. wentii</i>        | <i>Cremeri</i>      |
| <b>XIV</b>  | *KJ777803.1- <i>A. calidoustus</i><br>CCMFBH-940                                                                                   | MT410164                                     | <i>A. calidoustus</i>   | <i>Usti</i>         |
| <b>XV</b>   | * KX455751.1- <i>A. versicolor</i><br>CCMFBH-950<br>CCMFBH-972                                                                     | MT410167<br>MT410173                         | <i>A. versicolor</i>    | <i>Versicolores</i> |
| <b>XVI</b>  | * MG831183.1 - <i>A. sydowii</i><br>* KU737555.1 <i>A. sydowii</i><br>CCMFBH-835<br>CCMFBH-862<br>CCMFBH-874                       | MT410087<br>MT410088<br>MT410089             | <i>A. sydowii</i>       | <i>Versicolores</i> |

|              |                                                                                                                                                                                                                               |                                                                                                                                  |                          |                   |
|--------------|-------------------------------------------------------------------------------------------------------------------------------------------------------------------------------------------------------------------------------|----------------------------------------------------------------------------------------------------------------------------------|--------------------------|-------------------|
|              | CCMFBH-889<br>CCMFBH-899<br>CCMFBH-916<br>CCMFBH-960<br>CCMFBH-973<br>CCMFBH-974<br>CCMFBH-987<br>CCMFBH-990                                                                                                                  | MT410090<br>MT410091<br>MT410092<br>MT410093<br>MT410094<br>MT410095<br>MT410096<br>MT410097                                     |                          |                   |
| <b>XVII</b>  | *KJ775092.1- <i>A. templicola</i><br>KJ775087.1- <i>A. templicola</i><br>CCMFBH-967                                                                                                                                           | MT410171                                                                                                                         | <i>A. templicola</i>     | <i>Flavipedes</i> |
| <b>XVIII</b> | *KJ775085.1- <i>A. micronesiensis</i><br>CCMFBH-920<br>CCMFBH-965<br>CCMFBH-969                                                                                                                                               | MT410158<br>MT410170<br>MT410172                                                                                                 | <i>A. micronesiensis</i> | <i>Flavipedes</i> |
| <b>XIX</b>   | *MG991317.1- <i>A. tamaraii</i><br>*MH279885.1- <i>A. tamaraii</i><br>CCMFBH-850<br>CCMFBH-853<br>CCMFBH-854<br>CCMFBH-895<br>CCMFBH-902<br>CCMFBH-911<br>CCMFBH-924<br>CCMFBH-933<br>CCMFBH-976<br>CCMFBH-985<br>CCMFBH-1000 | MT410126<br>MT410127<br>MT410128<br>MT410148<br>MT410150<br>MT410152<br>MT410159<br>MT410162<br>MT410174<br>MT410176<br>MT410182 | <i>A. tamaraii</i>       | <i>Flavi</i>      |
| <b>XX</b>    | *AF255067.1- <i>A. nomius</i><br>*KP418578.1 <i>A. nomius</i><br>CCMFBH-866                                                                                                                                                   | MT410133                                                                                                                         | <i>A. nomius</i>         | <i>Flavi</i>      |
| <b>XXI</b>   | *F669489.1 <i>A. oryzae</i><br>CCMFBH-888                                                                                                                                                                                     | MT410145                                                                                                                         | <i>A. oryzae</i>         | <i>Flavi</i>      |
| <b>XXII</b>  | *MN148880.1 <i>A. flavus</i><br>*KY272750.1 <i>A. flavus</i><br>CCMFBH-837<br>CCMFBH-847<br>CCMFBH-856<br>CCMFBH-858<br>CCMFBH-870<br>CCMFBH-891                                                                              | MT347711<br>MT347712<br>MT347713<br>MT347714<br>MT347715<br>MT347716                                                             | <i>A. flavus</i>         | <i>Flavi</i>      |

|              |                                                                                                                                                                                                                  |                                                                                                                                                                      |                     |                 |
|--------------|------------------------------------------------------------------------------------------------------------------------------------------------------------------------------------------------------------------|----------------------------------------------------------------------------------------------------------------------------------------------------------------------|---------------------|-----------------|
|              | CCMFBH-892<br>CCMFBH-896<br>CCMFBH-918<br>CCMFBH-923<br>CCMFBH-925<br>CCMFBH-929<br>CCMFBH-938<br>CCMFBH-948<br>CCMFBH-956<br>CCMFBH-968<br>CCMFBH-970<br>CCMFBH-984<br>CCMFBH-986<br>CCMFBH-992                 | MT347717<br>MT347718<br>MT347719<br>MT347720<br>MT410160<br>MT347721<br>MT347722<br>MT347723<br>MT347724<br>MT347725<br>MT347726<br>MT347727<br>MT347728<br>MT347729 |                     |                 |
| <b>XXIII</b> | *MG991380.1- <i>A. fumigatus</i><br>*MG991403.1- <i>A. fumigatus</i><br>CCMFBH-876<br>CCMFBH-878<br>CCMFBH-921<br>CCMFBH-953<br>CCMFBH-958<br>CCMFBH-961<br>CCMFBH-962<br>CCMFBH-963<br>CCMFBH-977<br>CCMFBH-978 | MT347701<br>MT347702<br>MT347703<br>MT347704<br>MT347705<br>MT347706<br>MT347707<br>MT347708<br>MT347709<br>MT347710                                                 | <i>A. fumigatus</i> | <i>Fumigati</i> |
| <b>XXIV</b>  | *EU076336.1- <i>A. giganteus</i><br>*EU076337.1- <i>A. giganteus</i><br>*EU076338.1- <i>A. giganteus</i><br>CCMFBH-859<br>CCMFBH-860                                                                             | MT410129<br>MT410130                                                                                                                                                 | <i>A. giganteus</i> | <i>Clavati</i>  |
| <b>XXV</b>   | * KX455765.1- <i>A. clavatus</i><br>* KF669483.1 - <i>A. clavatus</i><br>CCMFBH-841<br>CCMFBH-842<br>CCMFBH-843<br>CCMFBH-844<br>CCMFBH-863<br>CCMFBH-941<br>CCMFBH-945<br>CCMFBH-1001                           | MT410121<br>MT410122<br>MT410123<br>MT410124<br>MT410132<br>MT410165<br>MT410166<br>MT410183                                                                         | <i>A. clavatus</i>  | <i>Clavati</i>  |
| <b>XXVI</b>  | *HQ632671.1 <i>A. aculeatus</i>                                                                                                                                                                                  |                                                                                                                                                                      | <i>A. aculeatus</i> | <i>Nigri</i>    |

|              |                                                                                              |          |                          |              |
|--------------|----------------------------------------------------------------------------------------------|----------|--------------------------|--------------|
|              | CCMFBH-993                                                                                   | MT410178 |                          |              |
| <b>XXVII</b> | *FJ491685.1- <i>A. violaceofuscus</i><br>*FJ491686.1- <i>A. violaceofuscus</i><br>CCMFBH-893 | MT410147 | <i>A. violaceofuscus</i> | <i>Nigri</i> |

\* Reference sequences used for maximum likelihood analysis
